# Supplementary material for: A unified framework for inferring the multi-scale organization of chromatin domains from Hi-C
Source: PubMed Central journal article supplement (PMC7997044; doi:10.1371/journal.pcbi.1008834), 2021-03-16
Supplement: pcbi.1008834.s002.pdf [file pcbi.1008834.s002.pdf]

Supplementary Information for:

## A unified framework for inferring the multi-scale organization of chromatin domains from Hi-C

Ji Hyun Bak, Min Hyeok Kim, Lei Liu, Changbong Hyeon

### S2 Appendix

#### Derivation of the likelihood function

Here we derive the likelihood function, **Eq 14**.

**Problem:** We want to compute

$$p(\mathbf{x}|\mathbf{s}, \mathbf{g}) = \langle \delta^N(\mathbf{x} - \mathbf{f}(\eta, \epsilon)) \rangle_{\eta, \epsilon} \quad (\text{S2-1})$$

with the following assumptions:

- $\mathbf{x} \in \mathbb{R}^N$  is a sequence of normalized and uncorrelated observations, with zero mean  $\langle \mathbf{x} \rangle = \mathbf{0}_N$  and unit covariance  $\text{Cov}(\mathbf{x}) = I_N$ .
- $\mathbf{s} = (s_1, \dots, s_N)$  is a clustering map that assigns each site  $i \in \{1, \dots, N\}$  to a cluster index  $s_i \in \{1, \dots, K\}$ . Without loss of generality, we can assume that  $s_i \leq s_j$  whenever  $i < j$  (ordered indexing).
- $\eta \sim \mathcal{N}(\mathbf{0}_N, \Lambda)$  and  $\epsilon \sim \mathcal{N}(\mathbf{0}_N, \Sigma)$  are i.i.d. gaussian random variables, where  $\Lambda$  and  $\Sigma$  are  $N \times N$  covariance matrices. The cluster-dependent covariance is a block diagonal matrix  $\Lambda = [\Lambda_s] = [\mathbf{1}_{n_s} \mathbf{1}_{n_s}^\top]$ , defined element-wise as  $(\Lambda)_{ij} = \delta_{s_i, s_j}$ . The site-wise variation is assumed to be uncorrelated, with a unit covariance matrix  $\Sigma = I_N$ , or  $(\Sigma)_{ij} = \delta_{ij}$ .
- The clustering strength  $\mathbf{g} = (g_1, \dots, g_K)$  parameterizes the target function  $\mathbf{f}$ , defined element-wise as

$$f_i(\eta, \epsilon) = \frac{\sqrt{g_{s_i}} \eta_i + \epsilon_i}{\sqrt{1 + g_{s_i}}}, \quad i = 1, \dots, N. \quad (\text{S2-2})$$

Two lemmas will be useful. The Gaussian integral lemma:

$$\int_{\mathbb{R}^N} d\mathbf{z} \mathcal{N}(\mathbf{z}|\boldsymbol{\mu}, M) e^{i\mathbf{a}^\top \mathbf{z}} = \exp\left(-\frac{1}{2} \mathbf{a}^\top M \mathbf{a}\right), \quad \mathbf{a} \in \mathbb{R}^N; \quad (\text{S2-3})$$

and the Sherman-Morrison formula:

$$(A + \mathbf{u}\mathbf{v}^\top)^{-1} = A^{-1} - \frac{A^{-1}\mathbf{u}\mathbf{v}^\top A^{-1}}{1 + \mathbf{v}^\top A^{-1}\mathbf{u}}. \quad (\text{S2-4})$$

**Solution:** Let us abbreviate the coefficients as  $\alpha_s \equiv \sqrt{g_s/(1+g_s)}$  and  $\beta_s \equiv 1/\sqrt{1+g_s}$ , such that  $f_i = \alpha_{s_i}\eta_i + \beta_{s_i}\epsilon_i$ . Further define  $A \equiv \text{diag}(\alpha_{s_i})$  and  $B \equiv \text{diag}(\beta_{s_i})$ , to write  $\mathbf{f} = A\boldsymbol{\eta} + B\boldsymbol{\epsilon}$ . Taking the inverse Fourier transform of the Dirac delta function, we can write  $\delta^N(\mathbf{x} - \mathbf{f}) = \int \frac{d\mathbf{k}}{(2\pi)^N} e^{i(\mathbf{x}-\mathbf{f})^\top \mathbf{k}} = \int \frac{d\mathbf{k}}{(2\pi)^N} e^{i(\mathbf{x}-A\boldsymbol{\eta}-B\boldsymbol{\epsilon})^\top \mathbf{k}}$ , where  $\int = \int_{\mathbb{R}^N}$  unless otherwise specified. Now we can rewrite **Eq S2-1**, and evaluate the gaussian integrals using the lemma (**Eq S2-3**):

$$\begin{aligned} p(\mathbf{x}|\mathbf{s}, \mathbf{g}) &= \int \frac{d\mathbf{k}}{(2\pi)^N} e^{i\mathbf{x}^\top \mathbf{k}} \int d\boldsymbol{\eta} \mathcal{N}(\boldsymbol{\eta}) e^{-iA\boldsymbol{\eta}^\top \mathbf{k}} \int d\boldsymbol{\epsilon} \mathcal{N}(\boldsymbol{\epsilon}) e^{-iB\boldsymbol{\epsilon}^\top \mathbf{k}} \\ &= \int \frac{d\mathbf{k}}{(2\pi)^N} \exp\left(i\mathbf{x}^\top \mathbf{k} - \frac{1}{2}(A\mathbf{k})^\top \Lambda(A\mathbf{k}) - \frac{1}{2}(B\mathbf{k})^\top \Sigma(B\mathbf{k})\right) \\ &= \int \frac{d\mathbf{k}}{(2\pi)^N} \exp\left(i\mathbf{x}^\top \mathbf{k} - \frac{1}{2}\mathbf{k}^\top Q\mathbf{k}\right), \end{aligned} \quad (\text{S2-5})$$

where  $Q \equiv (A\Lambda A + B\Sigma B)$ . Recognizing that this is another (unnormalized) gaussian integral with covariance matrix  $Q^{-1}$ , we use the lemma (**Eq S2-3**) once again:

$$\begin{aligned} p(\mathbf{x}|\mathbf{s}, \mathbf{g}) &= \sqrt{(2\pi)^N \det Q^{-1}} \int \frac{d\mathbf{k}}{(2\pi)^N} \mathcal{N}(\mathbf{k}|\mathbf{0}, Q^{-1}) e^{i\mathbf{x}^\top \mathbf{k}} \\ &= \exp\left(-\frac{1}{2}\mathbf{x}^\top Q^{-1}\mathbf{x} - \frac{1}{2}\log \det Q\right). \end{aligned} \quad (\text{S2-6})$$

With uncorrelated  $\boldsymbol{\epsilon}$ , both  $Q$  and  $Q^{-1}$  are block diagonal matrices, the exponent is completely separable by clusters:

$$\log p(\mathbf{x}|\mathbf{s}, \mathbf{g}) = -\frac{1}{2} \sum_{s=1}^K (\mathbf{x}_s^\top Q_s^{-1} \mathbf{x}_s + \log \det Q_s), \quad (\text{S2-7})$$

where  $\mathbf{x}_s$  is the corresponding  $n_s$ -dimensional subset of  $\mathbf{x}$ , and  $Q_s = A_s \Lambda_s A_s + B_s \Sigma_s B_s = \alpha_s^2 \Lambda_s + \beta_s^2 \Sigma_s$ , is the  $n_s \times n_s$  block matrix corresponding to cluster index  $s$ ; element-wise,  $(Q_s)_{ij} = \alpha_s^2 + \beta_s^2 \delta_{ij}$ .

We now simplify the two terms in the summand of **Eq S2-7**, and show that the resulting expression corresponds to **Eq 14**. First, the quadratic term can be expanded by using the Sherman-Morrison formula (**Eq S2-4**):

$$Q_s^{-1} = (\beta_s^2 I_{n_s} + (\alpha_s \mathbf{1}_{n_s})(\alpha_s \mathbf{1}_{n_s})^\top)^{-1} = \frac{1}{\beta_s^2} \left( I - \frac{(\alpha_s^2/\beta_s^2) \mathbf{1}\mathbf{1}^\top}{1 + (\alpha_s^2/\beta_s^2) \mathbf{1}^\top \mathbf{1}} \right). \quad (\text{S2-8})$$

The quadratic form is

$$\mathbf{x}_s^\top Q_s^{-1} \mathbf{x}_s = (1 + g_s) \left( n_s - \frac{g_s c_s}{1 + g_s n_s} \right), \quad (\text{S2-9})$$

where  $\mathbf{x}_s^\top \mathbf{x}_s = \sum_{i=1}^N (x_i)^2 \delta_{s_i, s} \approx \langle x_i^2 \rangle \sum_{i=1}^N \delta_{s_i, s} = n_s$ , and  $\mathbf{x}_s^\top (\mathbf{1}\mathbf{1}^\top) \mathbf{x}_s = \sum_{i,j=1}^N x_i x_j \delta_{s_i, s} \delta_{s_j, s} \equiv c_s$ .

Second, the log-determinant term can be calculated by considering the eigenvalues of the matrix  $Q_s$ . Solving for  $Q_s \mathbf{z} = \lambda_s \mathbf{z}$  for an arbitrary  $n_s$ -dimensional vector  $\mathbf{z}$ ,

$$\lambda_s \mathbf{z} = \alpha_s^s (\mathbf{1}^\top \mathbf{z}) \mathbf{1} + \beta_s^2 \mathbf{z}; \quad (\text{S2-10})$$

there are two types of solutions. The first possibility is to have the eigenvector  $\mathbf{z} \propto \mathbf{1}$ , in which case  $\lambda_{s,1} = \alpha_s^2 n_s + \beta_s^2 = (1 + g_s n_s)/(1 + g_s)$ . The other possibility is to have

$(\lambda_s - \beta_s^2)\mathbf{z}$  vanish, where  $\lambda_{s,2} = \dots = \lambda_{s,n_s} = \beta_s^2 = 1/(1 + g_s)$ ; the degenerate eigenvectors span the remaining  $(n_s - 1)$ -dimensional subspace. Therefore

$$\det(Q_s) = (\alpha_s^2 n_s + \beta_s^2) \cdot (\beta_s^2)^{n_s - 1} = \frac{1 + g_s n_s}{(1 + g_s)^{n_s}}, \quad (\text{S2-11})$$

and

$$\log \det(Q_s) = \log(1 + g_s n_s) - n_s \log(1 + g_s). \quad (\text{S2-12})$$

Substitution of **Eq S2-9** and **Eq S2-12** into **Eq S2-7** yields **Eq 14**.
