# Supplementary material for: A unified framework for inferring the multi-scale organization of chromatin domains from Hi-C
Source: PubMed Central journal article supplement (PMC7997044; doi:10.1371/journal.pcbi.1008834), 2021-03-16

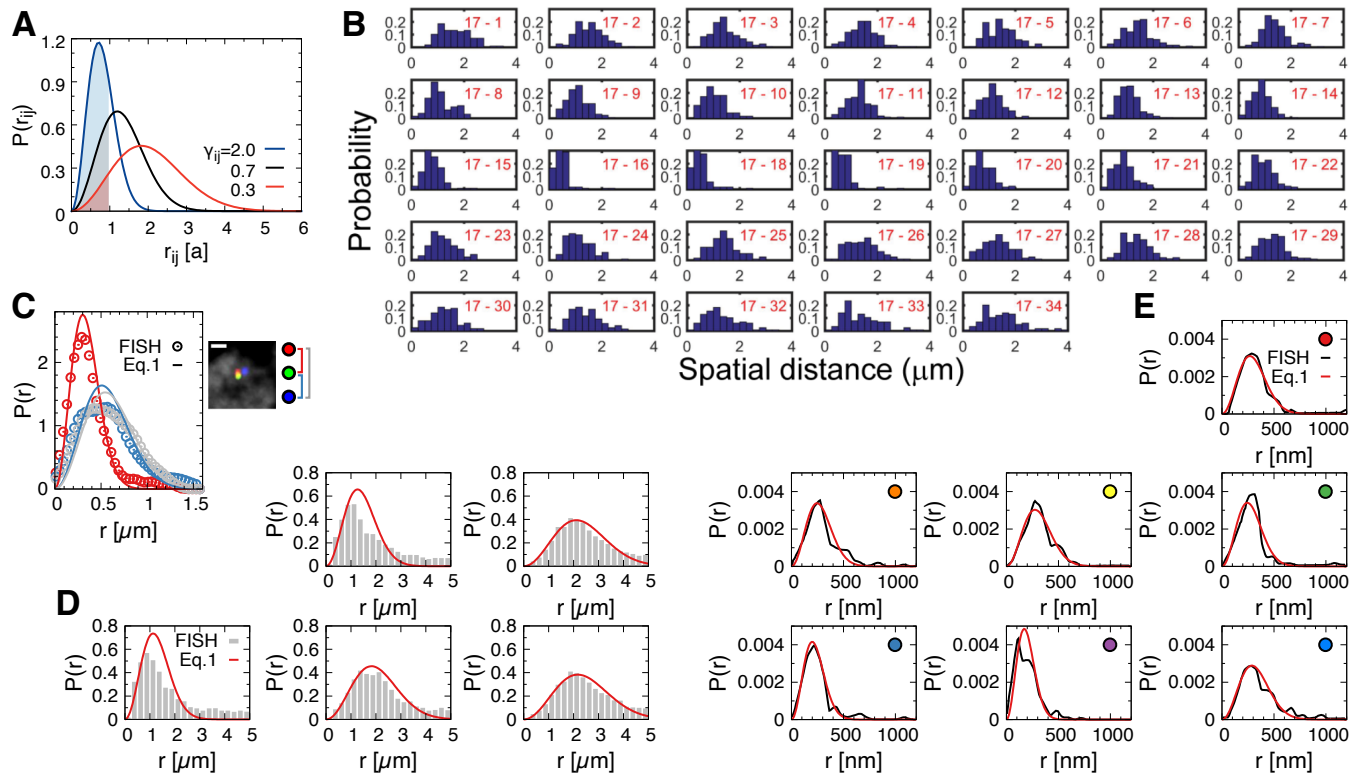

Supplement: pcbi.1008834.s004.pdf [file pcbi.1008834.s004.pdf]
