# Supplementary material for: A unified framework for inferring the multi-scale organization of chromatin domains from Hi-C
Source: PubMed Central journal article supplement (PMC7997044; doi:10.1371/journal.pcbi.1008834), 2021-03-16
Supplement: pcbi.1008834.s010.pdf [file pcbi.1008834.s010.pdf]

**A**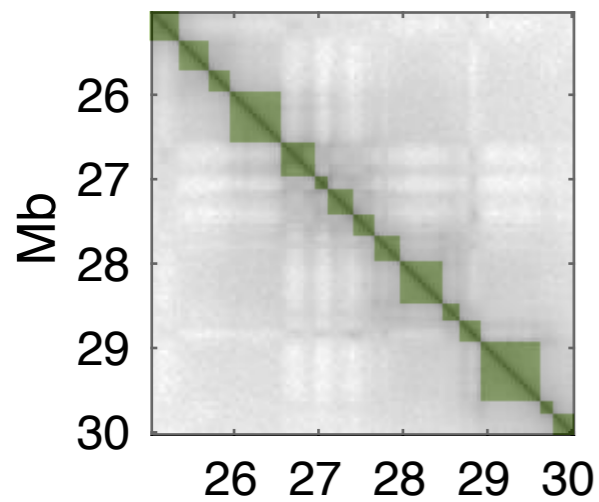Multi-CD  
←

GM12878: chr10

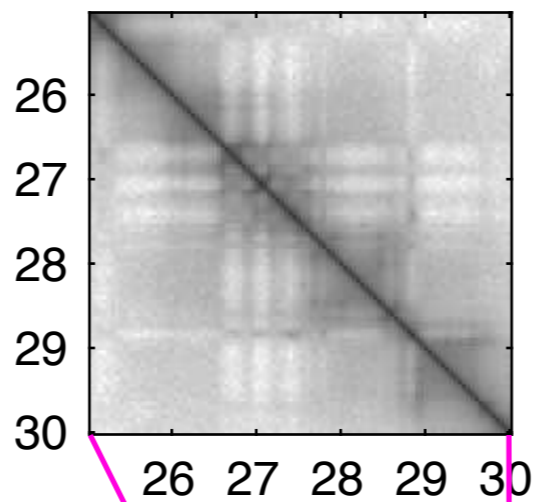Arrowhead  
→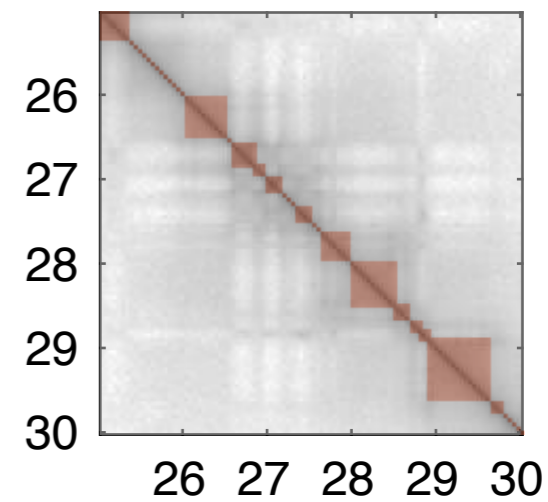**sub-TAD****B**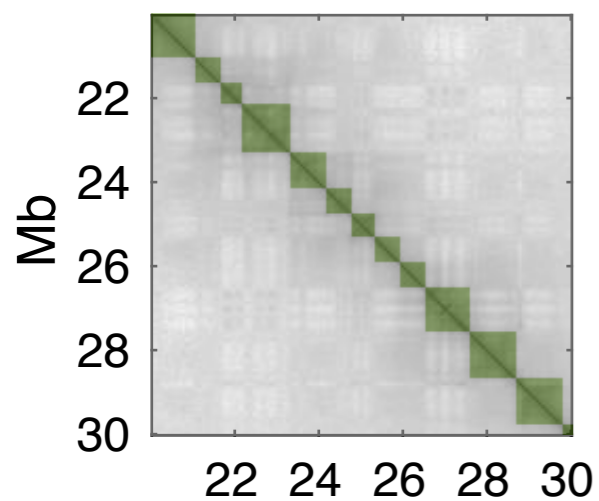Multi-CD  
←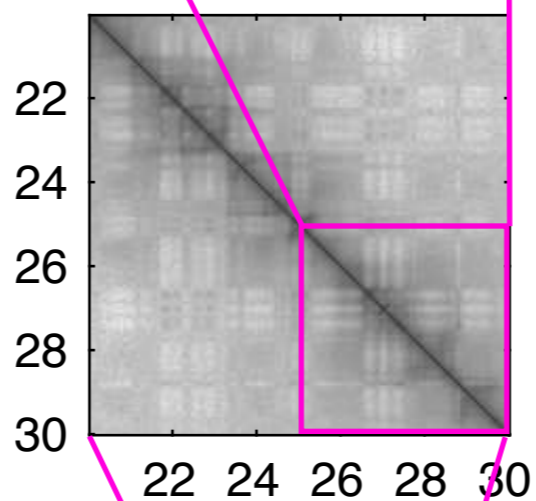DomainCaller  
→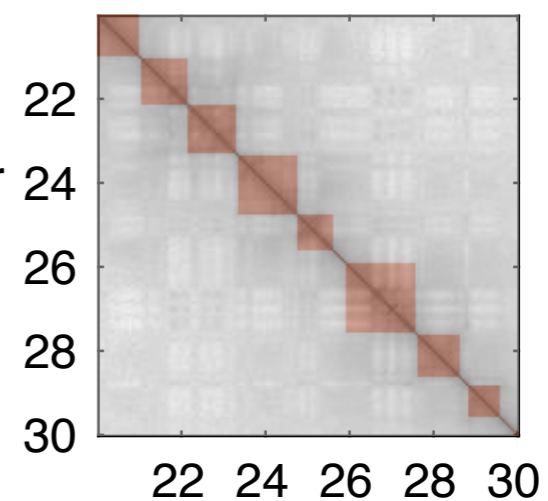**TAD****C**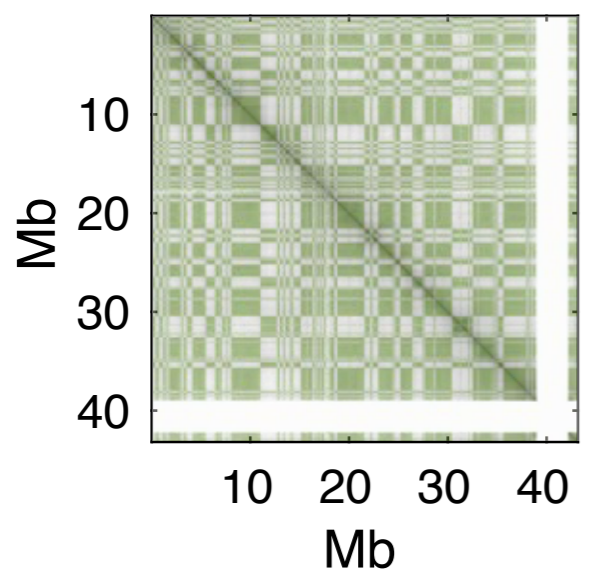Multi-CD  
←

133.8 Mb

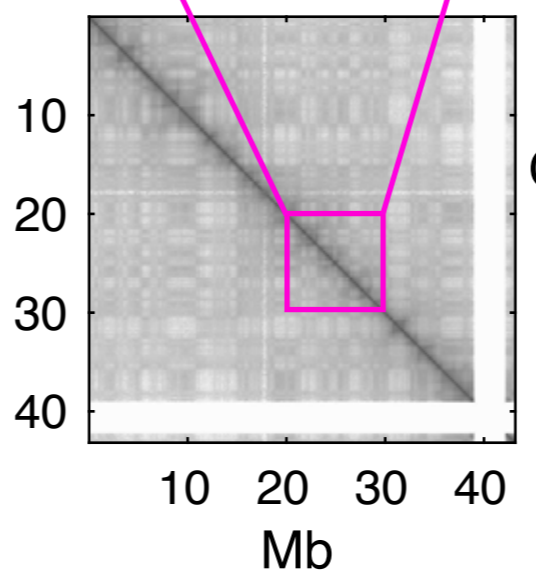GaussianHMM  
→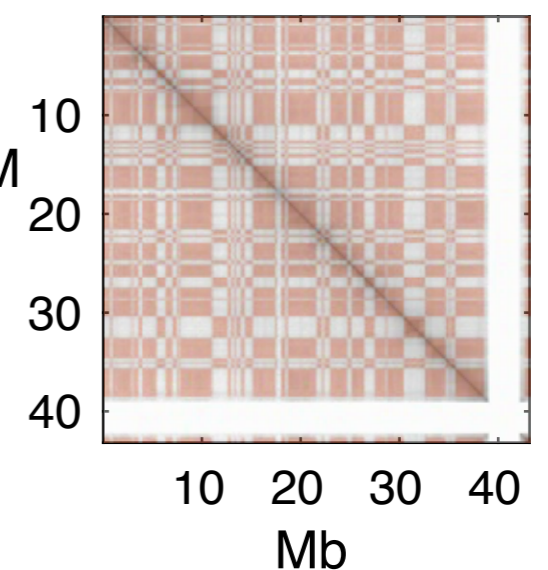**Compartment**
