# Supplementary material for: A unified framework for inferring the multi-scale organization of chromatin domains from Hi-C
Source: PubMed Central journal article supplement (PMC7997044; doi:10.1371/journal.pcbi.1008834), 2021-03-16
Supplement: pcbi.1008834.s011.pdf [file pcbi.1008834.s011.pdf]

A-compartment B-compartment

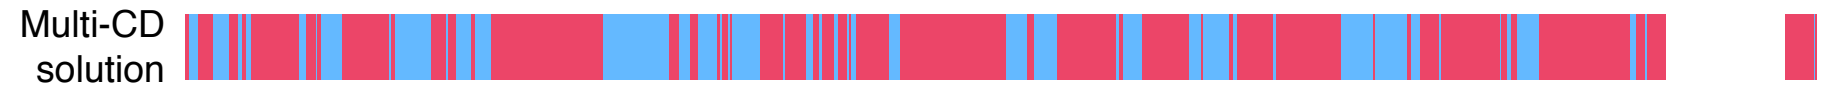

Repli-Seq signal

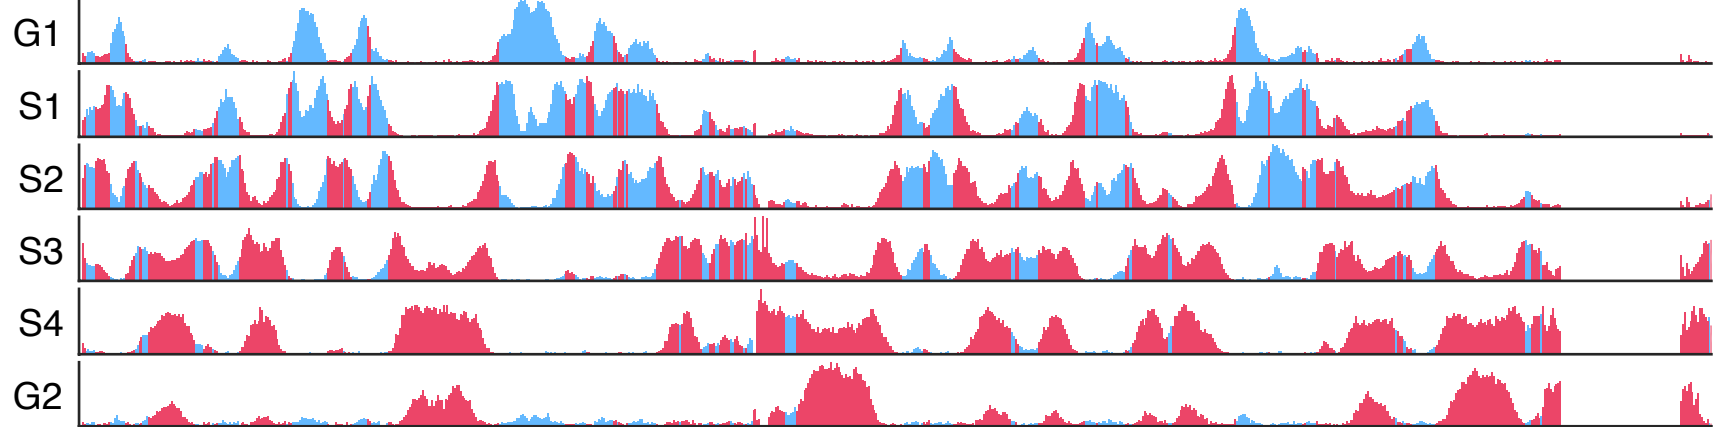

Histone marks

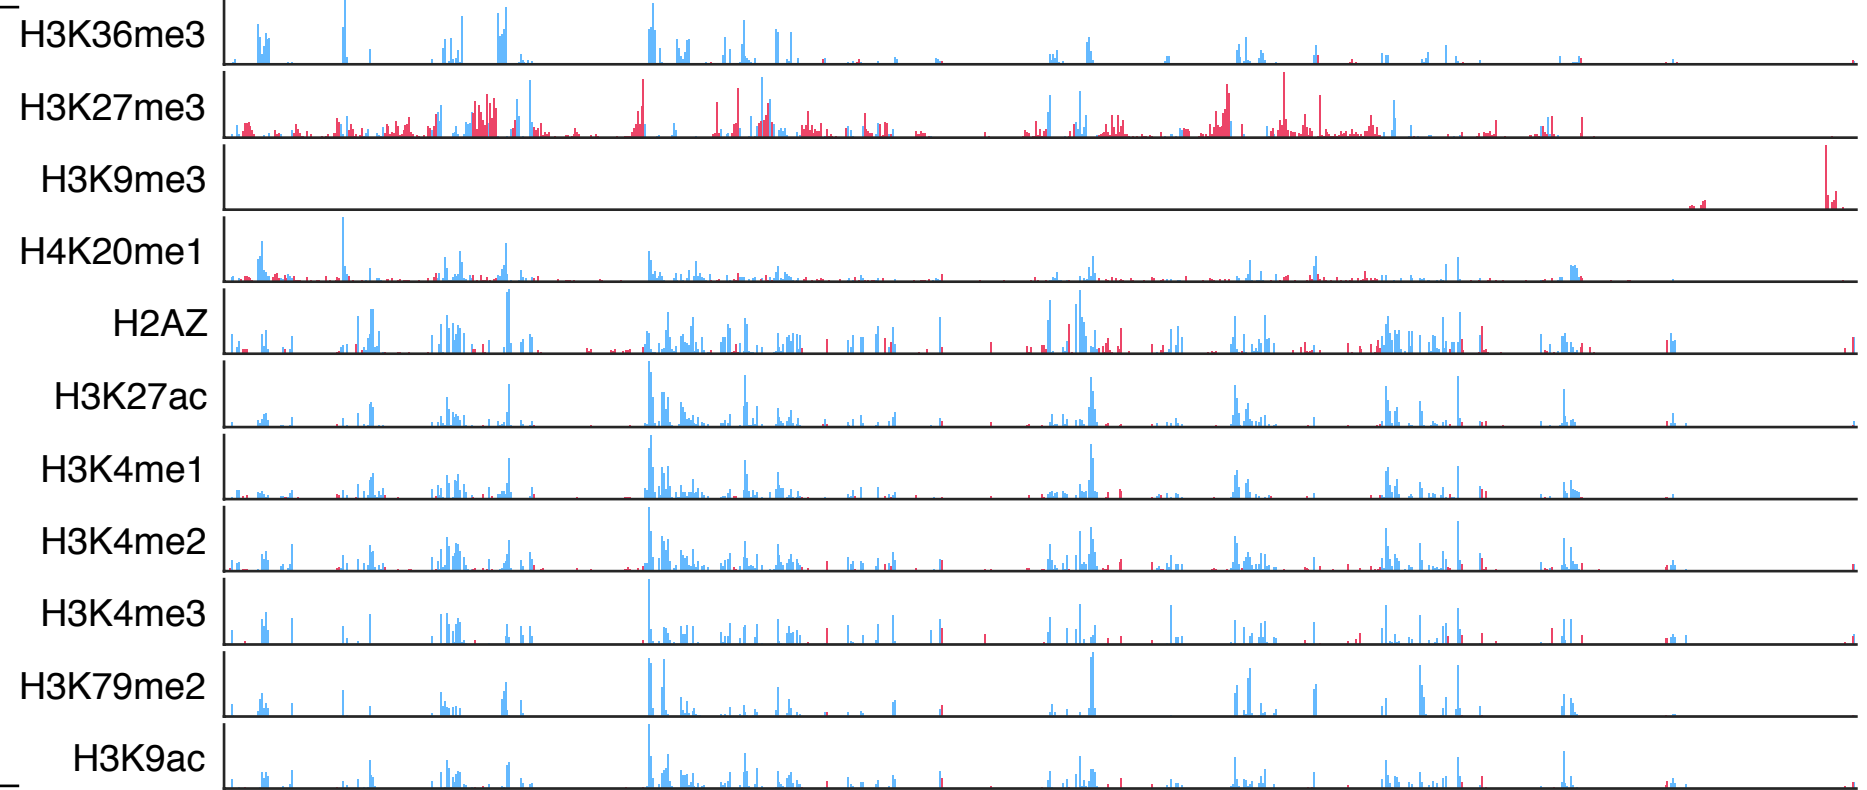

0 5 10 15 20 25 30 35 40 45

Position on chr10 (Mb)

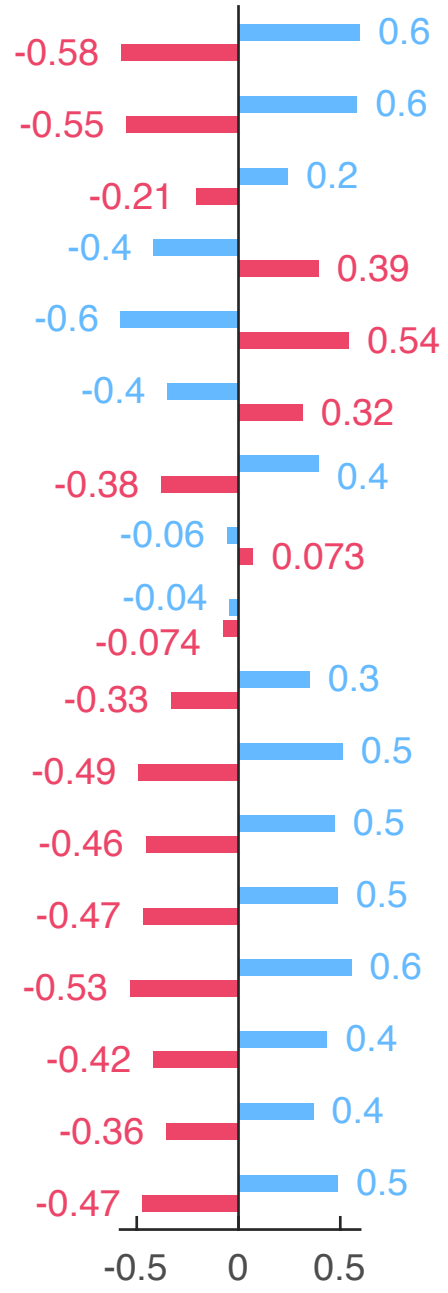

Pearson correlation
